# *t10c12* Conjugated Linoleic Acid Suppresses HER2 Protein and Enhances Apoptosis in SKBr3 Breast Cancer Cells: Possible Role of COX2

Margaret Flowers<sup>1\*</sup>, Patricia A. Thompson<sup>2</sup>

<sup>1</sup> Department of Nutritional Sciences, University of Arizona, Tucson, Arizona, United States of America, <sup>2</sup> Department of Epidemiology, Mel and Enid Zuckerman College of Public Health, Arizona Cancer Center, University of Arizona, Tucson, Arizona, United States of America

## Abstract

**Background:** HER2-targeted therapy with the monoclonal antibody trastuzumab (Herceptin<sup>®</sup>) has improved disease-free survival for women diagnosed with HER2-positive breast cancers; however, treatment resistance and disease progression are not uncommon. Current data suggest that resistance to treatment in HER2 cancers may be a consequence of NF- $\kappa$ B overexpression and increased COX2-derived prostaglandin E<sub>2</sub> (PGE<sub>2</sub>). Conjugated linoleic acid (CLA) has been shown to have anti-tumor properties and to inhibit NF- $\kappa$ B activity and COX2.

**Methods:** In this study, HER2-overexpressing SKBr3 breast cancer cells were treated with *t10c12* CLA. Protein expression of the HER2 receptor, nuclear NF- $\kappa$ B p65, and total and phosphorylated I $\kappa$ B were examined by western blot and immunofluorescence. PGE<sub>2</sub> levels were determined by ELISA. Proliferation was measured by metabolism of 3-(4, 5-Dimethylthiazol-2-yl)-2, 5-diphenyltetrazolium bromide (MTT), and apoptosis was measured by FITC-conjugated Annexin V staining and flow cytometry.

**Results/Conclusions:** We observed a significant decrease in HER2 protein expression on western blot following treatment with 40 and 80  $\mu$ M *t10c12* CLA ( $p < 0.01$  and  $0.001$ , respectively) and loss of HER2 protein in cells using immunofluorescence that was most pronounced at 80  $\mu$ M. Protein levels of nuclear NF- $\kappa$ B p65 were also significantly reduced at the 80  $\mu$ M dose. This was accompanied by a significant decrease in PGE<sub>2</sub> levels ( $p = 0.05$ ). Pretreatment with *t10c12* CLA significantly enhanced TNF $\alpha$ -induced apoptosis and the anti-proliferative action of trastuzumab ( $p = 0.05$  and  $0.001$ , respectively). These data add to previous reports of an anti-tumor effect of *t10c12* CLA and suggest an effect on the HER2 oncogene that may be through CLA mediated downregulation of COX2-derived PGE<sub>2</sub>.

**Citation:** Flowers M, Thompson PA (2009) *t10c12* Conjugated Linoleic Acid Suppresses HER2 Protein and Enhances Apoptosis in SKBr3 Breast Cancer Cells: Possible Role of COX2. PLoS ONE 4(4): e5342. doi:10.1371/journal.pone.0005342

**Editor:** Joseph Alan Bauer, Cleveland Clinic, United States of America

**Received:** February 3, 2009; **Accepted:** March 31, 2009; **Published:** April 28, 2009

**Copyright:** © 2009 Flowers, Thompson. This is an open-access article distributed under the terms of the Creative Commons Attribution License, which permits unrestricted use, distribution, and reproduction in any medium, provided the original author and source are credited.

**Funding:** This work was funded in part through the Mel and Enid Zuckerman Foundation and investigator start-up money from the University of Arizona Cancer Center. The funders had no role in study design, data collection and analysis, decision to publish, or preparation of the manuscript.

**Competing Interests:** The authors have declared that no competing interests exist.

\* E-mail: mflowers@email.arizona.edu

## Introduction

Overexpression of the HER2 oncogene occurs in 25–30% of human breast cancers and is associated with poor outcome [1]. HER2 overexpression often occurs with estrogen receptor (ER) negative disease, making these tumors resistant to hormonal therapies [2]. Treatment with trastuzumab (Herceptin<sup>®</sup>) has improved disease-free survival in patients with metastatic breast cancer, but is limited by both cardio toxicity and inherent and acquired resistance [3]. Significant effort is currently directed at combining Herceptin<sup>®</sup> with traditional anticancer agents as well as emerging therapies against additional target molecules, including inhibitors of other receptor tyrosine kinases, nuclear factor- $\kappa$ B (NF- $\kappa$ B), and chaperone protein HSP90 to improve clinical outcome [2,4,5,6].

One rationale for the use of combination therapies is to modulate multiple, deregulated tumor targets to reduce the likelihood of acquired resistance to the primary therapy. The molecular basis for acquired resistance to Herceptin<sup>®</sup> is poorly

understood, but may involve HER2-independent upregulation of phosphoinositide 3 (PI3) and mitogen activated protein (MAP) kinase pathways, possibly through upregulation of insulin-like growth factor-1 receptor (IGF-IR) or EGFR ligand activation [7]. Chemotherapy-induced NF- $\kappa$ B expression attenuates the intended cell killing effect and may play a role in drug resistance that is often seen in HER2 and EGFR overexpression [8,9].

NF- $\kappa$ B is a key transcription factor in the regulation of the inflammatory response [10]. In basal conditions, NF- $\kappa$ B is sequestered in the cytoplasm by the inhibitor- $\kappa$ B (I $\kappa$ B) complex [11]. Activation occurs when the inhibitor of I $\kappa$ B, I $\kappa$ B-kinase (IKK) phosphorylates I $\kappa$ B, releasing NF- $\kappa$ B to migrate to the nucleus and regulate the expression of genes involved in tumor promotion and progression such as growth factors, cell cycle regulators, anti-apoptotic proteins, stromal remodeling proteases, angiogenic factors, and cell adhesion molecules [9,11,12,13]. Constitutive activity of NF- $\kappa$ B has been reported in a number of cancers [14,15,16,17,18,19,20] and is known to inhibit apoptosis and promote tumorigenesis through regulation of proliferation,

angiogenesis, invasion, and metastasis [21,22,23,24]. In breast cancer, constitutive activity of NF- $\kappa$ B causes loss of estrogen receptor (ER) and resistance to chemo-, radiation-, and antibody-based therapies through signaling events downstream of ERBB2 or EGFR [9,19,25]. One of the key targets of NF- $\kappa$ B is the inducible cyclooxygenase COX2, the enzyme responsible for the conversion of arachadonic acid to prostaglandin (PG) $E_2$  [26]. COX2 and PGE $_2$  have been implicated in the progression of breast and other cancers and may act to sustain HER2 signaling [27,28,29].

Conjugated linoleic acid (CLA) belongs to a group of conjugated diene isomers of linoleic acid that are predominantly produced in the rumen of ruminant animals and available as dietary supplements for weight loss. The two most prominent isomers, *cis9-trans11* (*c9t11*) and *trans10-cis12* (*t10c12*), have been shown to have anti-tumor activity including proapoptotic activity [30,31], inhibitory effects on cell cycle progression, proliferation [32,33], and angiogenesis [34]. NF- $\kappa$ B-induced signaling is a frequent consequence of the upregulation of PI3 and MAP kinase pathways in cancer [11] and has been demonstrated to be a target of CLA in both cancer and non-cancer cells [35,36,37].

Though CLA has been shown to inhibit HER2 and ERBB3 protein expression in a colon cancer model [38,39], its effect in a HER2 breast cancer model has not been previously investigated. Based on the reported associations between NF- $\kappa$ B and HER2 overexpression in breast cancer, we investigated the effect of CLA on cell growth characteristics in the HER2 overexpressing SKBr3 breast cancer cells with the hypothesis that CLA would inhibit HER2 by downregulating NF- $\kappa$ B signaling. Our results support an isomer-specific inhibitory effect of *t10c12* CLA on HER2 protein expression and membrane association in SKBr3 breast cancer cells. Our data provide evidence that this effect may be a consequence of CLA-induced downregulation of COX2-induced PGE $_2$  production secondary to inhibition of NF- $\kappa$ B activity.

## Materials and Methods

### Reagents

Trypsin-EDTA, RPMI, PBS, fatty acid-free BSA, and DMSO were obtained from CellGrow (Herndon, VA). Fetal bovine serum was obtained from Atlas Biologicals (Fort Collins, CO). Penicillin/streptomycin was obtained from GIBCO/Invitrogen (Carlsbad, CA). Anti-beta actin, Annexin V-FITC Apoptosis Detection Kit (APOAF), C75, HEPES buffer, DTT, MgCl $_2$ , NaCl, and KCL were obtained from Sigma (St. Louis, MO). TritonX-100 was obtained from Pharmacia Biosciences (Piscataway, NJ). Tissue culture hardware was obtained from Nalge Nunc (Rochester, NY). CLA isomers *cis9-trans11* (*c9t11*) and *trans10-cis12* (*t10c12*) were obtained from Matreya (Pleasant Gap, PA). CLA was complexed to FA-free BSA in a 4:1 molar ratio with 1 mM BSA stock. Antibodies against HER2 were obtained from Abcam (Cambridge, MA) for Western blot and from Calbiochem/Oncogene (Gibbstown, NJ) for immunofluorescence. Antibodies against NF- $\kappa$ B p65, I $\kappa$ B- $\alpha$ , phospho-I $\kappa$ B- $\alpha$  (Ser32), and p53 were obtained from Cell Signaling (Danvers, MA), as were the positive control lysates (#9243) for Western blot of NF- $\kappa$ B related proteins. Fluorescent conjugated anti-mouse (Alexa Fluor 488) and anti-rabbit (Alexa Fluor 564) were obtained from Molecular Probes/Invitrogen (Carlsbad, CA). ELISA EIA kit for PGE $_2$  determination was obtained from Cayman Chemical (Ann Arbor, MI). The MTT viability assay was obtained from Roche Applied Science (Indianapolis, IN). Herceptin $^{\text{®}}$  (Genentech, San Francisco, CA) was generously supplied by the Arizona Cancer Center Clinic in a stock solution of 21 mg/ml.

### Cell Culture

The *Her2*-overexpressing SKBr3 were obtained from American Type Culture Collection (Manassas, VA) and independently authenticated. Cells were cultivated in McCoy's 5A media supplemented with 1.5 mM L-glutamine (Hyclone, Logan, UT), 10% FBS and 1% penicillin/streptomycin, and maintained at 37°C and 5% CO $_2$ . Cells utilized in these experiments were confirmed to be mycoplasma free. Unless otherwise indicated, all treatments were performed in growth media.

### Cell Viability/Proliferation/Apoptosis

Cell viability was determined by trypan blue exclusion using Beckman Coulter Counter. Proliferation was determined by metabolic activity and the reduction of MTT (3-(4,5-Dimethylthiazol-2-yl)-2,5-diphenyltetrazolium bromide, a tetrazole). For proliferation assays,  $2.5 \times 10^4$  cells/well/100  $\mu$ l media were seeded in 96-well plates, allowed to adhere overnight, then washed and treated with *t10c12* CLA or vehicle as specified in figure legends. Determination of metabolic reduction of MTT was performed according to manufacturer's protocol (Roche Diagnostics, Mannheim, Germany). Absorbance was measured at 580 and 690 nm, using a microplate reader (Biotek Synergy 2) in accordance with the manufacturer's protocol. Apoptosis was measured by FITC conjugated Annexin V staining according to manufacturer's protocol (Sigma APOAF). Absorbance was read by flow cytometry using FACScan (BD Biosciences, San Jose, CA) in accordance with the manufacturer's protocol.

### Preparation of Whole-Cell Lysates

Cell pellets were washed two times in cold PBS and centrifuged at 2000 rpm for 10 minutes, then resuspended in ice-cold RIPA buffer (1 $\times$  PBS, 1% NP-40 (nonidet P40, Sigma) 0.1% SDS containing 1 mM phosphatase inhibitor, sodium orthovanadate, and HALT protease inhibitor cocktail (Pierce/Thermo Scientific, Rockford, IL). Protein concentration was determined by Pierce Micro BCA.

### Preparation of Nuclear Extracts

Cells were washed and harvested by trypsinisation, centrifuged to remove media, and washed twice in cold PBS. The protocol for nuclear extraction has been previously described [40]. All steps were performed at 4°C. Briefly, cell pellets were resuspended in hypotonic lysis buffer (10 mM HEPES pH 7.9, 1.5 mM MgCl $_2$ , 10 mM KCL, 0.5 mM fresh DTT, 1 $\times$  HALT protease inhibitor cocktail, and 0.1% TritonX-100) and transferred to microcentrifuge tubes. Tubes were vortexed at 16,000 rpm for 15 seconds and allowed to incubate one hour at 4°C on a rocking platform. Tubes were centrifuged at 16,000 rpm for 15 minutes, and the supernatant containing the cytoplasmic extract was removed. Nuclear pellets were resuspended in 10  $\mu$ l/ $\sim$ 8–10 $\times$ 10 $^6$  cells nuclear extract buffer (20 mM HEPES pH7.9, 25% glycerol, 420 mM NaCl, 1.5 mM MgCl $_2$ , 0.2 mM EDTA, 0.5 mM fresh DTT, and 1 $\times$  HALT.) Samples were vortexed at the highest setting for 15 seconds and incubated on ice for 30 minutes, vortexing every 10 minutes. Tubes were centrifuges as before. Supernatant containing nuclear extracts were diluted 1:4 in storage buffer (20 mM HEPES pH7.9, 20% glycerol, 1.5 mM MgCl $_2$ , 100 mM KCL, 0.2 mM EDTA, 0.5 mM fresh DTT, and 1 $\times$  HALT.) Protein concentration was determined by Bio-Rad Assay (500-0006). Extracts were stored at  $-80^{\circ}$ C until use.

### Immunoblot

10–25  $\mu$ g protein was loaded into 8 or 10% gels and separated by SDS PAGE using the Bio-Rad Criterion Gel system (Hercules,

CA). Proteins were transferred to polyvinylidene difluoride membrane (Amersham Biosciences, Piscataway, NJ) by electroelution. Membranes were immunoblotted using standard protocols. Pierce Super Signal Dura West Substrate<sup>TM</sup> was used for visualization of protein bands. For successive antibody probes, blots were stripped using Pierce Restore<sup>TM</sup> stripping reagent with modifications to the manufacturer's protocol. Removal of both primary and secondary antibodies was confirmed by ECL detection before reprobing. Densitometry of bands was performed using Scion Image version Alpha 4.0.3.2. Protein levels were normalized to beta actin or total protein and reported relative to vehicle (as described in figure legends).

### Immunofluorescence

Cells were grown on 12-mm glass coverslips in six-well plates at a seeding density of  $4 \times 10^5$  cells/well/3 ml. After overnight adherence, cells were treated with 40 or 80  $\mu\text{M}$  *t10c12* CLA or BSA for 24 hours. Cells were washed briefly in  $1 \times$  PBS, 0.1%  $\text{NaN}_3$ , before fixation in 2% paraformaldehyde (Pierce) for 20 minutes, and were then permeabilized in 0.2% Tween 20 (Sigma) for 5 minutes. Coverslips were blocked in 10% goat serum for one hour at room temperature and incubated overnight with antibodies prepared in blocking buffer ( $1 \times$  PBS, 0.1%  $\text{NaN}_3$ , 10% goat serum, 1% TritonX). After incubation of primary antibodies, coverslips were washed  $3 \times 5$  minutes in washing buffer ( $1 \times$  PBS, 0.1%  $\text{NaN}_3$ , 1% Tween 20). Dilutions of Alexa Fluor 488 anti-mouse or 564 anti-rabbit were prepared in blocking buffer at 1:600 and 1:1000, respectively. Coverslips were incubated with secondary antibodies for one hour at room temperature. Coverslips were washed as before, then fixed in 100% ethanol before being applied to  $3 \times 1$  mm microscope slides (Fisher Scientific, Pittsburgh, PA) using Dako (Glostrup, Denmark) fluorescent mounting medium. Images were taken at  $40 \times$  with Applied Precision (Issaquah, Washington) Delta Vision deconvolution microscope with SoftwoRX 3.5.0 software. Negative controls were incubated without primary antibody.

### Prostaglandin E<sub>2</sub> (PGE<sub>2</sub>) Determination

Cells were grown to confluence, harvested by trypsinisation, and seeded in six-well plates at a seeding density of  $1.0 \times 10^6$  cells/well/3 ml. After adherence overnight, cells were treated with *t10c12* CLA at the indicated concentrations and time points. One hour before harvesting, media was removed and replaced with serum-free media containing 15  $\mu\text{M}$  arachadonic acid as substrate for COX2. Supernatant was collected after treatment and centrifuged to remove cellular debris. An aliquot from each treatment was stored at  $-80^\circ\text{C}$  until use. Supernatant was prepared in three dilutions using culture media (1:10, 1:20, and 1:40), and PGE<sub>2</sub> concentration was determined by PGE<sub>2</sub> ELISA-based immunoassay (Cayman Chemical, Ann Arbor, MI). Negative controls did not receive arachadonic acid. The cells from these treatments were harvested and counted, and viability was determined by trypan blue. Cell pellets were then prepared for immunoblot.

### Statistics

Statistically significant differences between treatments were detected using the Student T test with a significance level of 0.05.

## Results

### The *t10c12* CLA Isomer Inhibits HER2 Expression in SKBr3

The SKBr3 breast cancer cell line overexpresses the HER2 protein due to genomic amplification at chromosome 17q12 [41]. Figure 1 shows that *t10c12* CLA significantly inhibited HER2

protein expression in SKBr3 cells by Western blot analysis in a dose-dependent manner (Figure 1A). This effect was not seen with the *c9t11* isomer at the concentrations and time points examined (data not shown). In agreement with Western blots, immunofluorescence staining of cells treated with *t10c12* CLA indicated a reduction in surface and membrane HER2 protein at both 40 and 80  $\mu\text{M}$  treatment (Figure 1B).

HER2 overexpression has been associated with an increase in NF- $\kappa\text{B}$  activity [9]. Pianetti et al., demonstrated that suppression of HER2 decreased NF- $\kappa\text{B}$  activity [42]. Based on this association and the observed suppression of HER2 protein by *t10c12* CLA, we tested whether nuclear localization of NF- $\kappa\text{B}$  was inhibited by *t10c12* CLA treatment. Nuclear extracts from SKBr3 cells treated with 40 and 80  $\mu\text{M}$  *t10c12* CLA were isolated and examined for the relative expression of the NF- $\kappa\text{B}$  p65 subunit by Western blot and immunofluorescence. Figure 2A shows a representative Western blot of p65 protein expression following 24-hour treatment with *t10c12* CLA. Nuclear p65 was reduced at both the 40 and 80  $\mu\text{M}$  doses in replicate experiments. The effect was statistically significant at 80  $\mu\text{M}$  ( $p = 0.05$ ) when compared to untreated controls. Immunofluorescence of anti-p65 in similarly treated cells confirmed an overall decrease in the p65 protein with CLA treatment (see Figure 2B).

Under basal conditions, NF- $\kappa\text{B}$  is sequestered in the cytoplasm by the I $\kappa\text{B}$  proteins. Phosphorylation of I $\kappa\text{B}$  by IKK targets the I $\kappa\text{B}$  complex for ubiquitination and proteosomal degradation, freeing NF- $\kappa\text{B}$  for nuclear localization [43]. To lend support to the data above, total and phosphorylated I $\kappa\text{B}$ - $\alpha$  protein levels were measured in whole cell lysates following similar treatments. In agreement with a downregulation of NF- $\kappa\text{B}$ , we observed a decrease in phosphorylated I $\kappa\text{B}$  protein levels at both the 40 and 80  $\mu\text{M}$  dose, that was statistically significant, Figure 2C.

### Treatment with *t10c12* CLA or Celecoxib<sup>®</sup> Results in Decrease in PGE<sub>2</sub> Levels and Suppression of HER2 Protein

Cyclooxygenases (COX) 1 and 2 are the rate-limiting enzymes in the conversion of arachadonic to prostaglandins. Constitutive COX1 is ubiquitously expressed and active in normal cellular processes. COX2 is induced as a consequence of NF- $\kappa\text{B}$  activation in response to various stimuli including stress, growth factors, cytokines, and oncogenes [13,28]. COX2-derived PGE<sub>2</sub> has been implicated in a number of pathways involved in tumorigenesis [28] and it has been shown to be a target of CLA in a number of cell types [44,45,46]. We next asked if the apparent loss of NF- $\kappa\text{B}$  activity supported by the Western blots would correlate to a downregulation of COX2 activity. Supernatant obtained from the above experiments was used to measure levels of secreted PGE<sub>2</sub> by ELISA as described in the Materials and Methods. As indicated in Figure 3A, *t10c12* CLA significantly inhibited PGE<sub>2</sub> at the 80  $\mu\text{M}$  dose ( $p < 0.05$ ). As positive control for COX2 downregulation, cells were treated with the COX2-specific inhibitor Celecoxib<sup>®</sup> at 20 and 40  $\mu\text{M}$  for 48 hours. 40  $\mu\text{M}$  Celecoxib<sup>®</sup> significantly inhibited PGE<sub>2</sub> production by more than 80% ( $p < 0.001$ ). Consistent with a prior report that PGE<sub>2</sub> influences HER2 expression [29], we found that reduction of HER2 correlated to a reduction in PGE<sub>2</sub> synthesis (Figure 3B).

### The *t10c12* CLA Enhances Anti-Growth Effects of TNF- $\alpha$ and Herceptin<sup>®</sup> in SKBr3 Cells

Overexpression of HER2 has been associated with attenuation of TNF $\alpha$ -induced apoptosis through upregulation of NF- $\kappa\text{B}$  [47,48]. NF- $\kappa\text{B}$  inhibition has been shown to sensitize SKBr3 cells to TNF $\alpha$  [48,49]. Based on the observed inhibition of NF- $\kappa\text{B}$

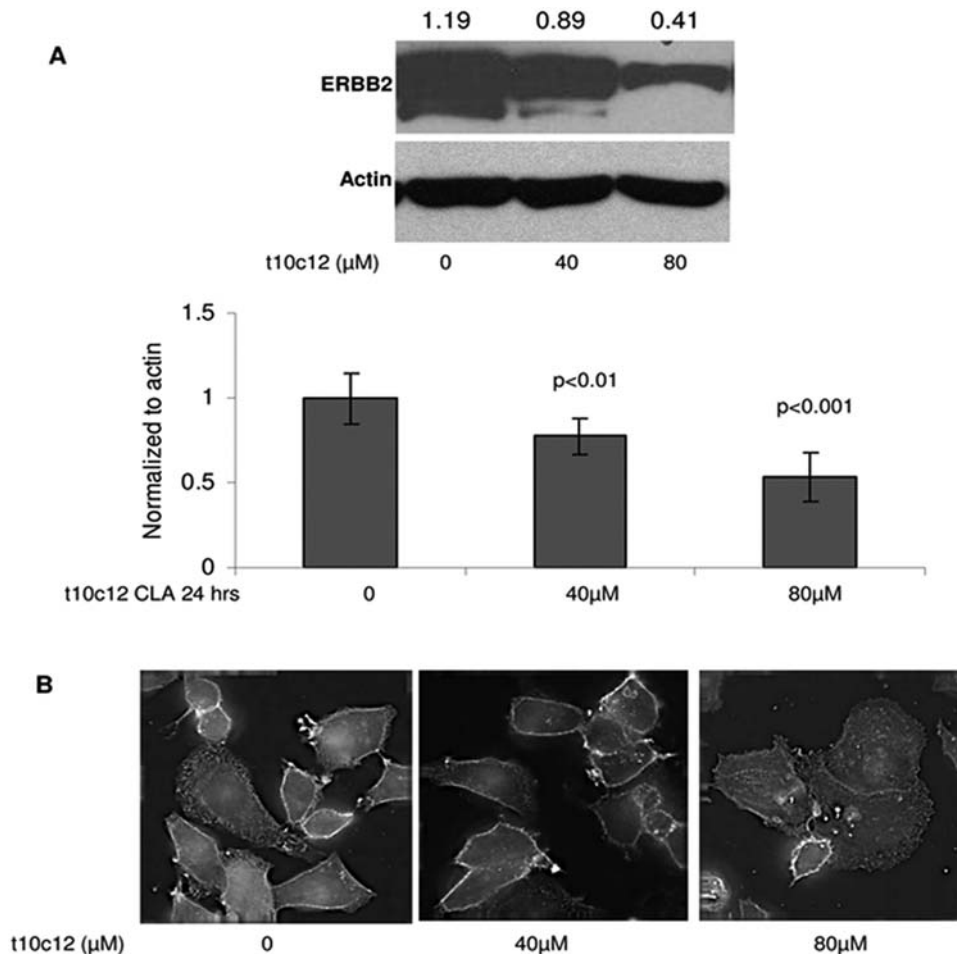

**Figure 1. *t10c12* CLA reduces HER2 protein in SK-Br3 cells.** (A) Representative western blot of total HER2 protein in response to 24 hr treatment with *t10c12* CLA. Cells were plated in 6-well plates, 3 wells per treatment. Cells from 3 wells were pulled and total protein was extracted as described in Materials and Methods. 25 μg of whole cell lysate were loaded into 8% gels. Densitometry of bands was performed using Scion Image software Alpha 4.0.3.2. Expression of HER2 was normalized to beta actin and compared to vehicle treatment. Values represent the mean  $\pm$  std error relative to vehicle from 5 independent experiments. (B) Immunofluorescence of HER2 protein in SK-Br3 cells following 24 hr treatment with 40 μM (middle panel), 80 μM (right panel) or vehicle (left panel). Cells were treated and immunofluorescence was performed as described in Materials and Methods. Images were obtained using Delta Vision deconvolution microscope with SoftwoRX 3.5.0 software at 40 $\times$  and optimized using Adobe Photoshop CS2 version 9.0.2.

doi:10.1371/journal.pone.0005342.g001

by the *t10c12* CLA, we predicted that pretreatment with the isomer would sensitize SKBr3 to TNF $\alpha$ . SKBr3 cells were pretreated with 80 μM *t10c12* CLA or vehicle control for 12 or 24 hours, media was removed, and cells were exposed to either TNF $\alpha$  in serum-depleted media (2% FBS) or serum-depleted media alone for an additional six hours. Both adherent and non-adherent cells were harvested and stained with FITC- Annexin V following the manufacturer's protocol (Sigma APOAF), and flow cytometry was performed to measure Annexin V positive cell fraction. As indicated in Figure 4A, exposure to 80 μM *t10c12* CLA showed a dose-dependent effect on the relative amount of Annexin V positive fraction following TNF $\alpha$  treatment that was statistically significant in 24-hour pretreatment conditions.

The monoclonal antibody trastuzumab (Herceptin<sup>®</sup>), which targets the extracellular domain of HER2, has been shown to inhibit proliferation in HER2-expressing cells, and inhibition of NF- $\kappa$ B has been shown to enhance these anti-proliferative effects in breast and colon cancer cells [29,50]. Though SKBr3 cells have been demonstrated to be sensitive to Herceptin<sup>®</sup>, anti-proliferative response is not generally seen before three days of exposure and is

enhanced in combination with other agents [51,52,53]. Based on its inhibition of NF- $\kappa$ B, we hypothesized that *t10c12* CLA would enhance the effect of Herceptin<sup>®</sup> in SKBr3 cells. In Figure 4B, cells were pretreated with 80 μM *t10c12* CLA for 24 hours, then co-treated with 10 nM Herceptin<sup>®</sup> for an additional 24 hours. The rationale for the pretreatment was based on the observed effect of 80 μM *t10c12* CLA on NF- $\kappa$ B downregulation in the SKBr3 cells. In preliminary dose escalation experiments, we did not detect a measurable effect of Herceptin<sup>®</sup> on proliferation in SKBr3 cells at any dose or exposure times tested (1–10 nM, 12–72 hours, data not shown). However, pretreatment with the *t10c12* CLA isomer significantly enhanced the anti-proliferative effects of Herceptin<sup>®</sup> by 25% ( $p=0.001$ ) compared to vehicle (Figure 4B). Neither Herceptin<sup>®</sup> nor CLA alone effectively inhibited proliferation at the doses and time points measured.

## Discussion

SKBr3 cancer cells are highly resistant to apoptosis [49,54], a phenotype that is likely due to the overexpression of HER2 [52]

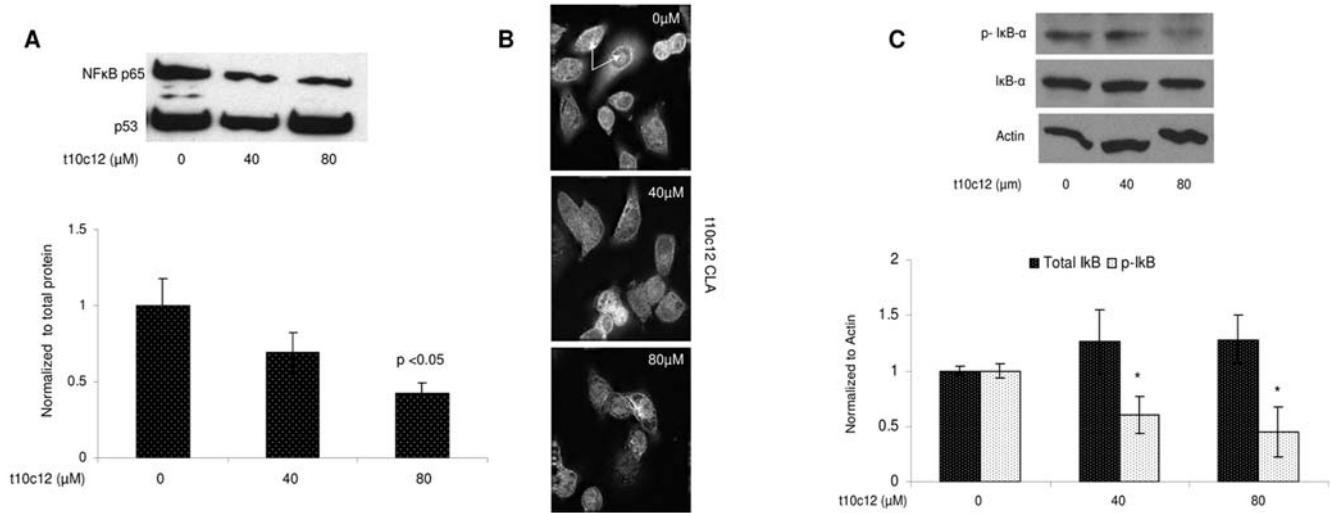

**Figure 2. *t10c12* CLA reduces nuclear p65 in SKBr3 cells.** (A) Western blots of NFκB p65 in nuclear extracts. Cells were plated in 6-well plates, 3 wells per treatment. Cells from 3 wells were pulled and nuclear extract was obtained as described in Materials and Methods. 10 μg of nuclear extract was loaded into 10% gels. Gel electrophoresis and immunoblots were performed as described in Materials and Methods. Densitometry of bands was performed using Scion Image software Alpha 4.0.3.2. Protein expression of p65 was normalized to total protein and compared to levels in untreated cells (vehicle only) (\*=0.05). Values represent means  $\pm$  std error relative to vehicle control from 3 independent experiments. (B) Immunofluorescence of p65. Cells were treated as above. Immunofluorescence was performed as described in Materials and Methods. Top panel: vehicle; Middle panel: 40 μM CLA; Bottom panel: 80 μM CLA. Images were obtained using Delta Vision deconvolution microscope with SoftwoRX 3.5.0 software at 40 $\times$  and optimized using Adobe PhotoShop CS2 version 9.0.2. (C) Western blot of total and phosphorylated IκB protein. Cells were plated and treated as above. 25 μg of whole cell lysate were loaded into 10% gels. Expression levels of IκB proteins were normalized to beta actin and compared to levels in untreated cells (vehicle only). Values represent means  $\pm$  std dev from 3 independent experiments (\*=0.05). Gel electrophoresis and immunoblots were performed as described in Materials and Methods. Densitometry of bands was performed using Scion Image software Alpha 4.0.3.2.

doi:10.1371/journal.pone.0005342.g002

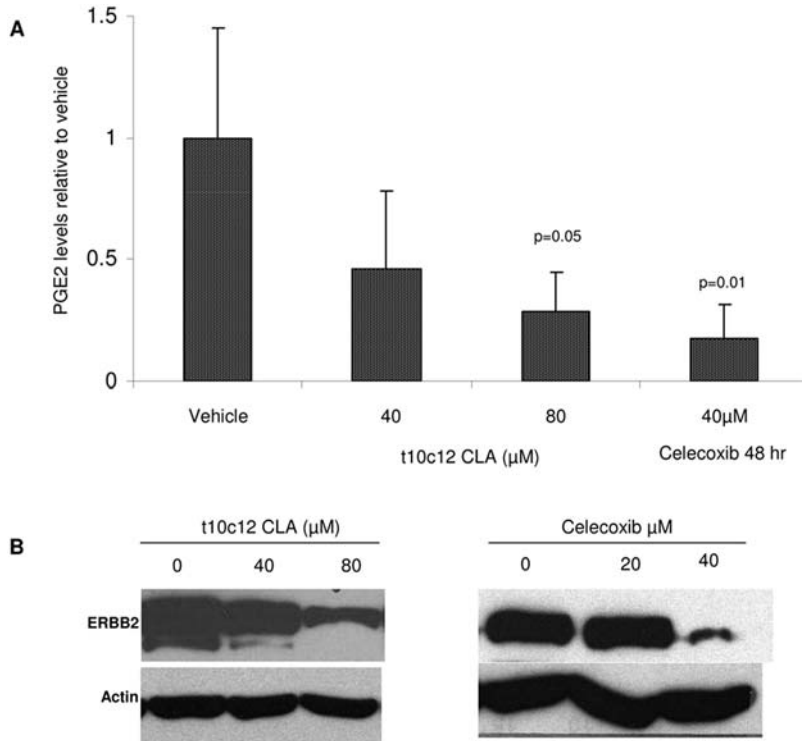

**Figure 3. Suppression of HER2 and COX2 in SKBr3 cells.** Cells were treated with *t10c12* CLA for 24 hrs or Celecoxib for 48 hrs. Cells were plated in 6-well plates, 3 wells per treatment. 30 minutes before collection, 15 μM arachidonic acid was added as substrate for COX2. Negative controls did not receive arachadonic acid. Cells from 3 wells were pulled for isolation of total protein and PGE<sub>2</sub> determination by ELISA. (A) Western blots of HER2 protein following treatment with *t10c12* CLA or celecoxib. Gel electrophoresis and immunoblots were performed as described in Materials and Methods. Densitometry of bands was performed using Scion Image software Alpha 4.0.3.2. (B) PGE<sub>2</sub> levels were measured by ELISA and are presented as pg/ml relative to vehicle. Values represent the means  $\pm$  std dev. from 2 independent experiments. (\*=0.05, \*\*=0.001). Experiments were performed as describe in Materials and Methods.

doi:10.1371/journal.pone.0005342.g003

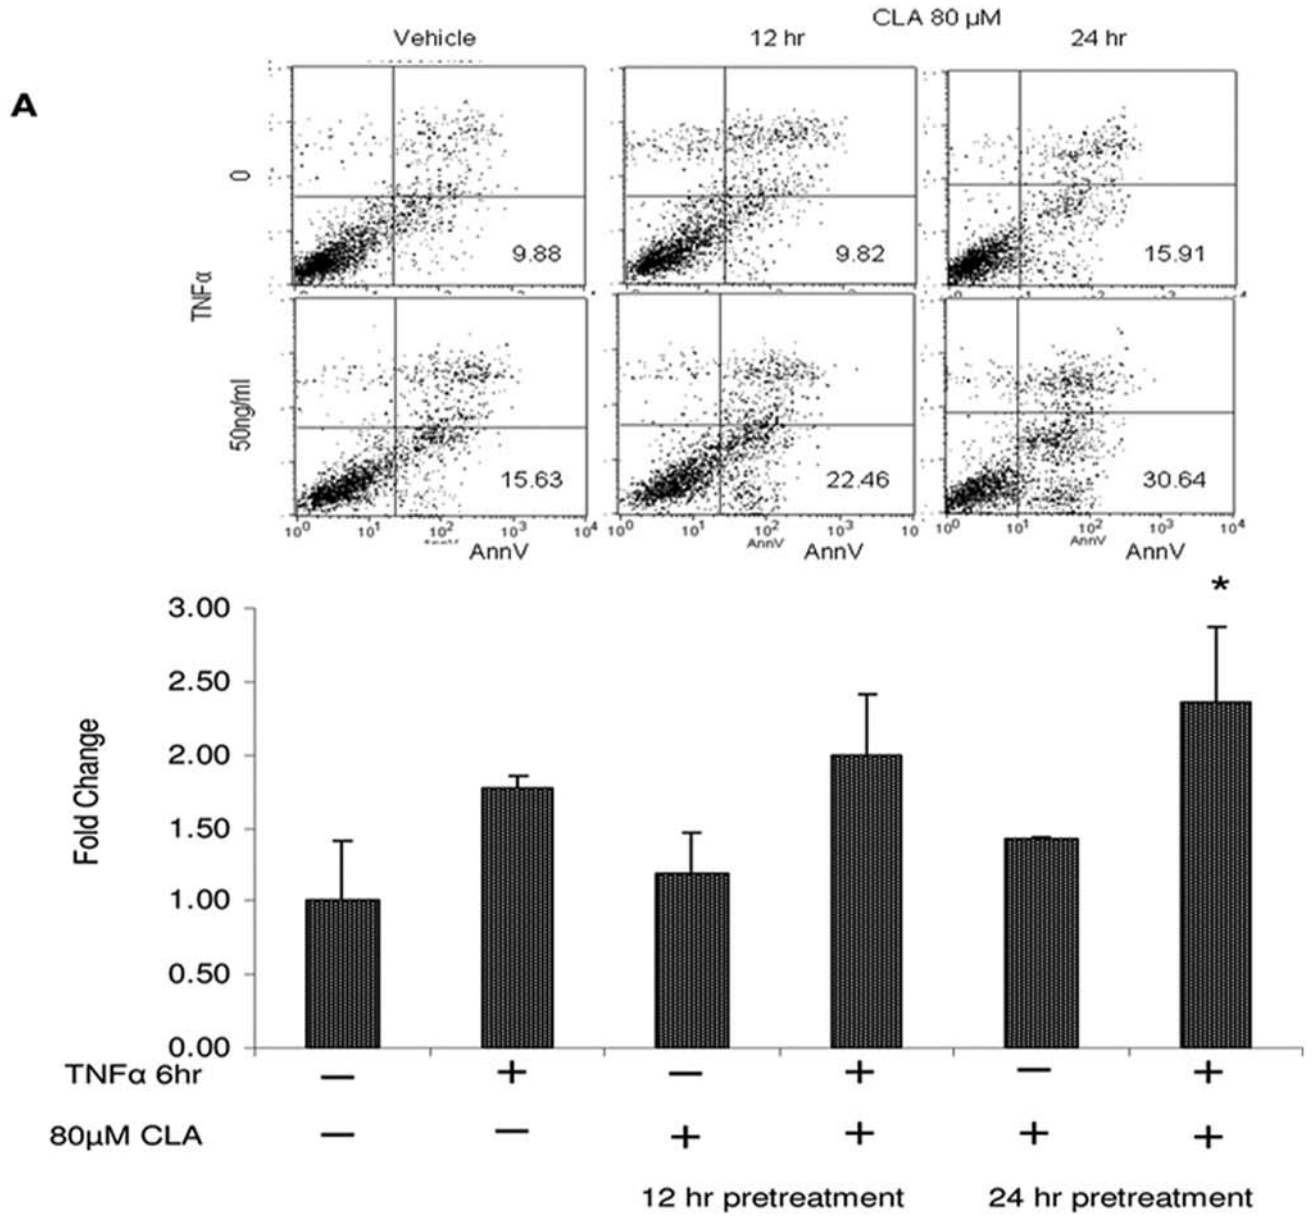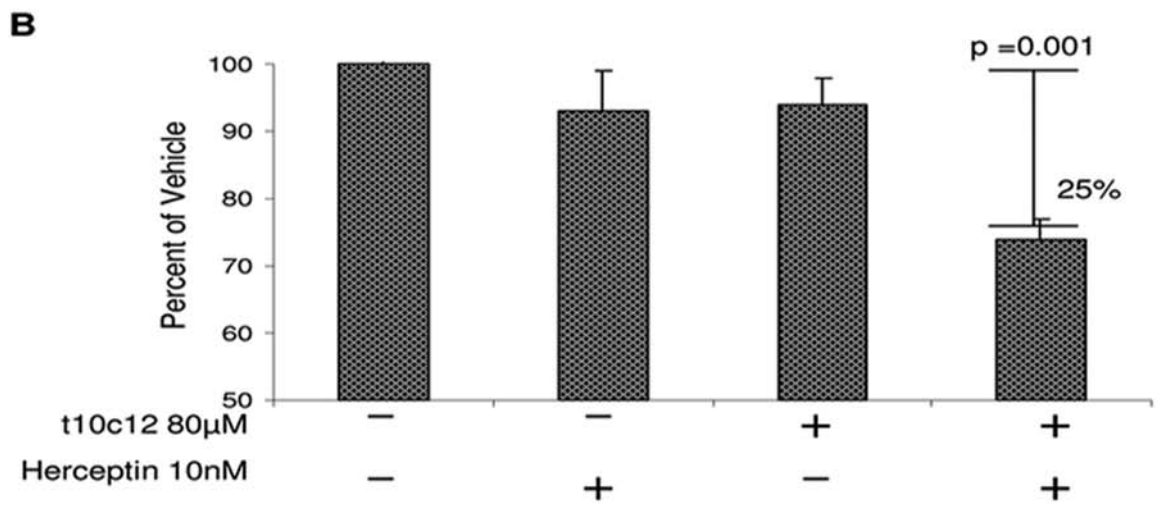

**Figure 4. *t10c12* CLA enhances anti-growth effects of TNF $\alpha$  and Herceptin $^{\text{®}}$  in SK-Br3 cells.** (A) CLA enhances TNF- $\alpha$  induced apoptosis. Cells were pretreated with 80  $\mu\text{M}$  *t10c12* CLA for 12 or 24 hours before exposure to 50 ng/ml recombinant TNF $\alpha$  for 6 hours. Cells were plated in 6-well plates, 1 well per treatment. Annexin V staining was evaluated independently for each well and values were pulled to obtain an average Annexin V value per treatment condition. FACS plots are from a single experiment. Quantification of effect is presented as mean fold change  $\pm$  std dev in % Annexin V positive staining cells relative to vehicle control and were derived from 2 independent experiments. ( $p=0.05$ ). (B) Cells were pretreated with 80  $\mu\text{M}$  *t10c12* CLA for 24 hrs, then co-treated with CLA  $\pm$  10nM Herceptin $^{\text{®}}$  for an additional 24 hrs. Viability was assessed by MTT and absorbance at 580nm. Cells were plated in 96 well plates, 6 wells per treatment. Absorbance values were pulled for each treatment to obtain an average. Values represent the mean from 3 experiments  $\pm$  std. dev. The combination treatment significantly reduced absorbance compared to the vehicle control. Experiments were performed as described in Materials and Methods.  
doi:10.1371/journal.pone.0005342.g004

and constitutive activity of the PI-3 kinase/AKT network, and NF- $\kappa\text{B}$ -induced signaling [6,22,42]. In this study, we show evidence that the *t10c12* isomer of CLA, at physiologically obtainable doses, significantly reduced HER2 protein in SKBr3 cells. Consistent with previous reports of NF- $\kappa\text{B}$  inhibition by CLA [36,55,56], 80  $\mu\text{M}$  *t10c12* CLA significantly reduced NF- $\kappa\text{B}$  nuclear localization and the phosphorylation of I $\kappa\text{B}\alpha$ . These data are noteworthy as they demonstrate the ability of the *t10c12* CLA isomer to target two key regulators in breast tumor promotion and treatment resistance, the HER2 receptor and NF- $\kappa\text{B}$ . These results support a mechanism of CLA that has not previously been demonstrated in an HER2-overexpressing breast cancer cell line. Although additional experiments are needed to confirm the direct target of CLA's action, we postulate two possible models for the observed effect of CLA on HER2 protein in SKBr3 cells illustrated in Figure 5.

In Figure 5A we suggest that CLA's inhibition of IKK indirectly downregulated HER2. As illustrated by the directional flow of the diagram, inhibition of IKK results in the downregulation of NF- $\kappa\text{B}$  and COX2-derived PGE $_2$  levels. Based on published evidence supporting an inhibitor role of PGE $_2$  on HER2 expression [29], a decrease in HER2 protein might also be observed by this mechanism. CLA has been associated with a decrease in IKK protein and activity in macrophages and attenuation of COX2 expression and PGE $_2$  synthesis [36]. In addition to the protein

analysis performed here, additional experiments, such as kinase activity assays for IKK  $\alpha$  and  $\beta$ , are needed to confirm a direct action of CLA on IKK. Additionally, though not included here, an electrophoretic mobility shift assay (EMSA) would be informative in confirming the downregulation of NF- $\kappa\text{B}$  transcriptional activity that would be expected with a decrease in IKK activity.

Alternatively, the data presented here may be explained by Figure 5B where we suggest that the observed downregulation of NF- $\kappa\text{B}$  signaling is through a CLA effect on the membrane-bound HER2 protein. This may be through a direct action causing downregulation of protein expression, as has been demonstrated in the HT29 colon cancer cell line [38], dissociation of HER2 from its chaperone, HSP90, as has been demonstrated in a gastric cancer model [57], or disruption of caveoli or lipid rafts, which has been recently demonstrated in response to CLA [58]. Any of these scenarios could inhibit IKK through downregulation of the PI-3 kinase pathway, resulting in decreased nuclear p65 and COX2-induced PGE $_2$  production, as is reported here.

Though not investigated here, CLA has been shown to downregulate COX2 by inhibiting 12-O-tetradecanoylphorbol-13-acetate (TPA)-induced AP-1 transcriptional activity [59]. As AP-1 proteins *c-fos* and *c-jun* have been shown to interact with nuclear p65 to enhance NF- $\kappa\text{B}$  promoter activity [60], an alternative scenario exists in which the downregulation of COX2 by *t10c12* CLA was through an AP-1 mediated

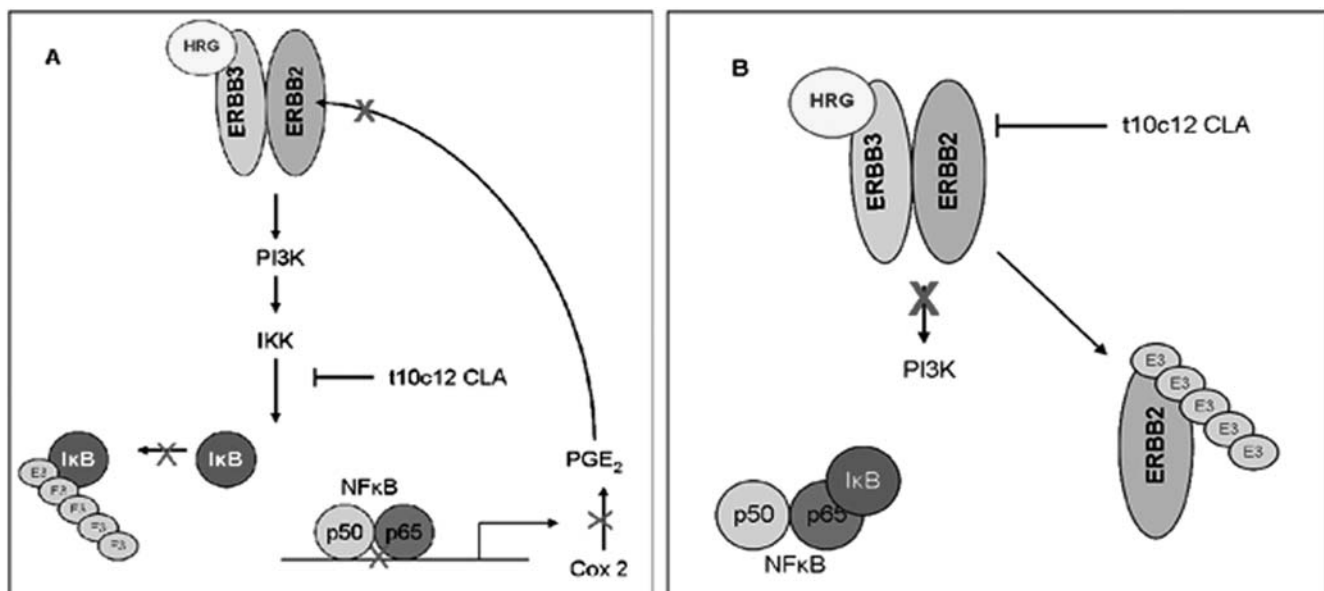

**Figure 5. Proposed mechanism of CLA action in SKBr3 cells.** (A) This scenario describes a direct effect on IKK by *t10c12* CLA. A consequence of IKK inhibition is reduced phosphorylation of I $\kappa\text{B}$  and nuclear localization of p65. A decrease in COX2-derived PGE $_2$  synthesis will result in loss of HER2 (as described in by Benoit et al, Oncogene, 2004; 23(8):1631). (B) This scenario describes a direct effect on HER2 protein by *t10c12* CLA. In this scenario, HER2 is dissociated from the plasma membrane and targeted for ubiquitination and proteosomal degradation. Loss of HER2 signaling downregulates PI-3 kinase and IKK activity. NF $\kappa\text{B}$  is sequestered in the cytosol by I $\kappa\text{B}$  and its target genes such as COX2 are not transcribed.  
doi:10.1371/journal.pone.0005342.g005

mechanism. This possibility is supported by evidence in HER2 overexpressing breast epithelial cells in which overexpression of *c-jun* attenuated a pharmacological inhibition of AP-1 mediated COX2 activation [61].

There is a recognized need to develop non-toxic strategies to improve clinical outcome in HER2-positive breast cancers. Inhibition of NF- $\kappa$ B in combination with HER2-targeted therapies may enhance treatment response, as has been demonstrated with combination anti-COX2 and anti-HER2 therapies [50,62,63,64]. The data presented here support further investigation into anti-NF- $\kappa$ B agents, such as specific isomers of CLA, in combination with Herceptin<sup>®</sup> in the treatment of a subset of breast cancers that are resistant to endocrine-based therapies.

There is a prevailing interest in the potential of bioactive compounds for their efficacy in tumor prevention and treatment. CLA has been demonstrated to have potent anti-tumor effects in some animal models of breast carcinogenesis [65]. Though poorly

studied in humans for the prevention of breast cancer, studies in body composition have determined it to be non-toxic at doses up to 6g/day [66]. However, studies reporting adverse effects of supplementation with mixed-isomers or the *t10c12* isomer alone suggest caution, and this is emphasized by recent reports of tumor promoting activity of the *t10c12* isomer in animal models [67,68]. Our data, however, add to a large body of work supporting an anti-tumor effect of the *t10c12* CLA isomer and warrant further investigation in the prevention and treatment of breast tumors overexpressing HER2/neu and NF- $\kappa$ B.

## Author Contributions

Conceived and designed the experiments: MF PAT. Performed the experiments: MF. Analyzed the data: MF PAT. Contributed reagents/materials/analysis tools: PAT. Wrote the paper: MF. Edited and approved final manuscript: PAT.

## References

- Ross JS, Fletcher JA (1998) The HER-2/neu oncogene in breast cancer: prognostic factor, predictive factor, and target for therapy. *Stem Cells* 16: 413–428.
- Yu D, Hung MC (2000) Overexpression of ErbB2 in cancer and ErbB2-targeting strategies. *Oncogene* 19: 6115–6121.
- Nahta R, Esteva FJ (2007) Trastuzumab: triumphs and tribulations. *Oncogene* 26: 3637–3643.
- Citri A, Kochupurakkal BS, Yarden Y (2004) The achilles heel of ErbB-2/HER2: regulation by the Hsp90 chaperone machine and potential for pharmacological intervention. *Cell Cycle* 3: 51–60.
- Moulder S, Hortobagyi GN (2008) Advances in the treatment of breast cancer. *Clin Pharmacol Ther* 83: 26–36.
- Ahmed KM, Cao N, Li JJ (2006) HER-2 and NF- $\kappa$ B as the targets for therapy-resistant breast cancer. *Anticancer Res* 26: 4235–4243.
- Valabrega G, Montemurro F, Aglietta M (2007) Trastuzumab: mechanism of action, resistance and future perspectives in HER2-overexpressing breast cancer. *Ann Oncol* 18: 977–984.
- Nakanishi C, Toi M (2005) Nuclear factor- $\kappa$ B inhibitors as sensitizers to anticancer drugs. *Nat Rev Cancer* 5: 297–309.
- Biswas DK, Iglehart JD (2006) Linkage between EGFR family receptors and nuclear factor  $\kappa$ B (NF- $\kappa$ B) signaling in breast cancer. *J Cell Physiol* 209: 645–652.
- Aggarwal BB (2004) Nuclear factor- $\kappa$ B: the enemy within. *Cancer Cell* 6: 203–208.
- Sethi G, Sung B, Aggarwal BB (2008) Nuclear factor- $\kappa$ B activation: from bench to bedside. *Exp Biol Med* (Maywood) 233: 21–31.
- Biswas DK, Dai SC, Cruz A, Weiser B, Graner E, et al. (2001) The nuclear factor  $\kappa$ B (NF- $\kappa$ B): a potential therapeutic target for estrogen receptor negative breast cancers. *Proc Natl Acad Sci U S A* 98: 10386–10391.
- Pahl HL (1999) Activators and target genes of Rel/NF- $\kappa$ B transcription factors. *Oncogene* 18: 6853–6866.
- Griffin JD (2001) Leukemia stem cells and constitutive activation of NF- $\kappa$ B. *Blood* 98: 2291.
- Kim BY, Gaynor RB, Song K, Dritschilo A, Jung M (2002) Constitutive activation of NF- $\kappa$ B in Ki-ras-transformed prostate epithelial cells. *Oncogene* 21: 4490–4497.
- Kim DW, Gazourian L, Quadri SA, Romieu-Mourez R, Sherr DH, et al. (2000) The RelA NF- $\kappa$ B subunit and the aryl hydrocarbon receptor (AhR) cooperate to transactivate the *c-myc* promoter in mammary cells. *Oncogene* 19: 5498–5506.
- Kordes U, Krappmann D, Heissmeyer V, Ludwig WD, Scheidereit C (2000) Transcription factor NF- $\kappa$ B is constitutively activated in acute lymphoblastic leukemia cells. *Leukemia* 14: 399–402.
- Myers RB, Brown D, Oelschlaeger DK, Waterbor JW, Marshall ME, et al. (1996) Elevated serum levels of p105(erbB-2) in patients with advanced-stage prostatic adenocarcinoma. *Int J Cancer* 69: 398–402.
- Nakshatri H, Bhat-Nakshatri P, Martin DA, Goulet RJ, Jr., Sledge GW, Jr. (1997) Constitutive activation of NF- $\kappa$ B during progression of breast cancer to hormone-independent growth. *Mol Cell Biol* 17: 3629–3639.
- Palayoor ST, Youmell MY, Calderwood SK, Coleman CN, Price BD (1999) Constitutive activation of I $\kappa$ B kinase alpha and NF- $\kappa$ B in prostate cancer cells is inhibited by ibuprofen. *Oncogene* 18: 7389–7394.
- Biswas DK, Martin KJ, McAlister C, Cruz AP, Graner E, et al. (2003) Apoptosis caused by chemotherapeutic inhibition of nuclear factor- $\kappa$ B activation. *Cancer Res* 63: 290–295.
- Cao Y, Luo JL, Karin M (2007) I $\kappa$ B kinase alpha kinase activity is required for self-renewal of ErbB2/Her2-transformed mammary tumor-initiating cells. *Proc Natl Acad Sci U S A* 104: 15852–15857.
- Biswas DK, Shi Q, Baily S, Strickland I, Ghosh S, et al. (2004) NF- $\kappa$ B activation in human breast cancer specimens and its role in cell proliferation and apoptosis. *Proc Natl Acad Sci U S A* 101: 10137–10142.
- Zhou Y, Yau C, Gray JW, Chew K, Dairkee SH, et al. (2007) Enhanced NF- $\kappa$ B and AP-1 transcriptional activity associated with antiestrogen resistant breast cancer. *BMC Cancer* 7: 59.
- Van Laere SJ, Van der Auwera I, Van den Eynden GG, van Dam P, Van Marck EA, et al. (2007) NF- $\kappa$ B activation in inflammatory breast cancer is associated with oestrogen receptor downregulation, secondary to EGFR and/or ErbB2 overexpression and MAPK hyperactivation. *Br J Cancer* 97: 659–669.
- Rossi A, Kapahi P, Natoli G, Takahashi T, Chen Y, et al. (2000) Anti-inflammatory cyclopentenone prostaglandins are direct inhibitors of I $\kappa$ B kinase. *Nature* 403: 103–108.
- Hardy DB, Janowski BA, Chen CC, Mendelson CR (2008) Progesterone receptor inhibits aromatase and inflammatory response pathways in breast cancer cells via ligand-dependent and ligand-independent mechanisms. *Mol Endocrinol* 22: 1812–1824.
- Furstenberger G, Krieg P, Muller-Decker K, Habenicht AJ (2006) What are cyclooxygenases and lipoxygenases doing in the driver's seat of carcinogenesis? *Int J Cancer* 119: 2247–2254.
- Benoit V, Relic B, Leval Xd X, Chariot A, Merville MP, et al. (2004) Regulation of HER-2 oncogene expression by cyclooxygenase-2 and prostaglandin E2. *Oncogene* 23: 1631–1635.
- Ip MM, Masso-Welch PA, Shoemaker SF, Shea-Eaton WK, Ip C (1999) Conjugated linoleic acid inhibits proliferation and induces apoptosis of normal rat mammary epithelial cells in primary culture. *Exp Cell Res* 250: 22–34.
- Majumder B, Wahle KW, Moir S, Schofield A, Choe SN, et al. (2002) Conjugated linoleic acids (CLAs) regulate the expression of key apoptotic genes in human breast cancer cells. *Faseb J* 16: 1447–1449.
- Kemp MQ, Jeffy BD, Romagnolo DF (2003) Conjugated linoleic acid inhibits cell proliferation through a p53-dependent mechanism: effects on the expression of G1-restriction points in breast and colon cancer cells. *J Nutr* 133: 3670–3677.
- Lim DY, Tyner AL, Park JB, Lee JY, Choi YH, et al. (2005) Inhibition of colon cancer cell proliferation by the dietary compound conjugated linoleic acid is mediated by the CDK inhibitor p21CIP1/WAF1. *J Cell Physiol* 205: 107–113.
- Masso-Welch PA, Zangani D, Ip C, Vaughan MM, Shoemaker S, et al. (2002) Inhibition of Angiogenesis by the Cancer Chemopreventive Agent Conjugated Linoleic Acid. *Cancer Res* 62: 4383–4389.
- Hwang DM, Kundu JK, Shin JW, Lee JC, Lee HJ, et al. (2007) cis-9,trans-11-conjugated linoleic acid down-regulates phorbol ester-induced NF- $\kappa$ B activation and subsequent COX-2 expression in hairless mouse skin by targeting I $\kappa$ B kinase and PI3K-Akt. *Carcinogenesis* 28: 363–371.
- Cheng WL, Lii CK, Chen HW, Lin TH, Liu KL (2004) Contribution of conjugated linoleic acid to the suppression of inflammatory responses through the regulation of the NF- $\kappa$ B pathway. *J Agric Food Chem* 52: 71–78.
- Li G, Barnes D, Butz D, Bjorling D, Cook ME (2005) 10t,12c-conjugated linoleic acid inhibits lipopolysaccharide-induced cyclooxygenase expression in vitro and in vivo. *J Lipid Res* 46: 2134–2142.
- Cho HJ, Kim WK, Jung JI, Kim EJ, Lim SS, et al. (2005) Trans-10, cis-12, not cis-9, trans-11, conjugated linoleic acid decreases ErbB3 expression in HT-29 human colon cancer cells. *World J Gastroenterol* 11: 5142–5150.
- Cho HJ, Kim WK, Kim EJ, Jung KC, Park S, et al. (2003) Conjugated linoleic acid inhibits cell proliferation and ErbB3 signaling in HT-29 human colon cell line. *Am J Physiol Gastrointest Liver Physiol* 284: G996–1005.
- Sroka IC, Nagle RB, Bowden GT (2007) Membrane-type 1 matrix metalloproteinase is regulated by sp1 through the differential activation of AKT, JNK, and ERK pathways in human prostate tumor cells. *Neoplasia* 9: 406–417.



41. Kao J, Pollack JR (2006) RNA interference-based functional dissection of the 17q12 amplicon in breast cancer reveals contribution of coamplified genes. *Genes Chromosomes Cancer* 45: 761–769.
42. Pianetti S, Arsura M, Romieu-Mourez R, Coffey RJ, Sonenshein GE (2001) Her-2/neu overexpression induces NF-kappaB via a PI3-kinase/Akt pathway involving calpain-mediated degradation of I kappa B-alpha that can be inhibited by the tumor suppressor PTEN. *Oncogene* 20: 1287–1299.
43. Hacker H, Karin M (2006) Regulation and function of IKK and IKK-related kinases. *Sci STKE* 2006: re13.
44. Iwakiri Y, Sampson DA, Allen KGD (2002) Suppression of cyclooxygenase-2 and inducible nitric oxide synthase expression by conjugated linoleic acid in murine macrophages. *Prostaglandins, Leukotrienes and Essential Fatty Acids* 67: 435–443.
45. Ma DW, Field CJ, Clandinin MT (2002) An enriched mixture of trans-10,cis-12-CLA inhibits linoleic acid metabolism and PGE2 synthesis in MDA-MB-231 cells. *Nutr Cancer* 44: 203–212.
46. Miller A, Stanton C, Devery R (2001) Modulation of arachidonic acid distribution by conjugated linoleic acid isomers and linoleic acid in MCF-7 and SW480 cancer cells. *Lipids* 36: 1161–1168.
47. Van Antwerp DJ, Martin SJ, Kafri T, Green DR, Verma IM (1996) Suppression of TNF-alpha-induced apoptosis by NF-kappaB. *Science* 274: 787–789.
48. Zhou BP, Hu MC, Miller SA, Yu Z, Xia W, et al. (2000) HER-2/neu blocks tumor necrosis factor-induced apoptosis via the Akt/NF-kappaB pathway. *J Biol Chem* 275: 8027–8031.
49. Weisz L, Damalas A, Lontos M, Karakaidos P, Fontemaggi G, et al. (2007) Mutant p53 enhances nuclear factor kappaB activation by tumor necrosis factor alpha in cancer cells. *Cancer Res* 67: 2396–2401.
50. Mann M, Sheng H, Shao J, Williams CS, Pisacane PI, et al. (2001) Targeting cyclooxygenase 2 and HER-2/neu pathways inhibits colorectal carcinoma growth. *Gastroenterology* 120: 1713–1719.
51. Lee S, Yang W, Lan KH, Sellappan S, Klos K, et al. (2002) Enhanced sensitization to taxol-induced apoptosis by herceptin pretreatment in ErbB2-overexpressing breast cancer cells. *Cancer Res* 62: 5703–5710.
52. Menendez JA, Vellon L, Colomer R, Lupu R (2005) Oleic acid, the main monounsaturated fatty acid of olive oil, suppresses Her-2/neu (erbB-2) expression and synergistically enhances the growth inhibitory effects of trastuzumab (Herceptin) in breast cancer cells with Her-2/neu oncogene amplification. *Ann Oncol* 16: 359–371.
53. Esparis-Ogando A, Ocana A, Rodriguez-Barrueco R, Ferreira L, Borges J, et al. (2008) Synergic antitumoral effect of an IGF-IR inhibitor and trastuzumab on HER2-overexpressing breast cancer cells. *Ann Oncol*.
54. Basu A, Mohanty S, Sun B (2001) Differential Sensitivity of Breast Cancer Cells to Tumor Necrosis Factor-[alpha]: Involvement of Protein Kinase C. *Biochemical and Biophysical Research Communications* 280: 883–891.
55. Ohtsu H, Ho E, Huang Y-S, Chuang L-T, Bray TM (2005) Conjugated linoleic acid decreases cellular proliferation and inhibits nuclear factor-[kappa]B and activator protein 1 activation in PC3 cancerous prostate epithelial cells. *Nutrition Research* 25: 655–662.
56. Song HJ, Sneddon AA, Heys SD, Wahle KW (2006) Induction of apoptosis and inhibition of NF-kappaB activation in human prostate cancer cells by the cis-9, trans-11 but not the trans-10, cis-12 isomer of conjugated linoleic acid. *Prostate* 66: 839–846.
57. Kim JM, Kim JS, Kim YJ, Oh YK, Kim IY, et al. (2008) Conjugated linoleic acids produced by *Lactobacillus dissociatus* IKK-gamma and Hsp90 complex in *Helicobacter pylori*-infected gastric epithelial cells. *Lab Invest* 88: 541–552.
58. Chapkin RS, McMurray DN, Davidson LA, Patil BS, Fan YY, et al. (2008) Bioactive dietary long-chain fatty acids: emerging mechanisms of action. *Br J Nutr* 100: 1152–1157.
59. Degner SC, Kemp MQ, Bowden GT, Romagnolo DF (2006) Conjugated linoleic acid attenuates cyclooxygenase-2 transcriptional activity via an anti-AP-1 mechanism in MCF-7 breast cancer cells. *J Nutr* 136: 421–427.
60. Stein B, Baldwin AS, Jr., Ballard DW, Greene WC, Angel P, et al. (1993) Cross-coupling of the NF-kappa B p65 and Fos/Jun transcription factors produces potentiated biological function. *Embo J* 12: 3879–3891.
61. Subbaramaiah K, Cole PA, Dannenberg AJ (2002) Retinoids and carnosol suppress cyclooxygenase-2 transcription by CREB-binding protein/p300-dependent and -independent mechanisms. *Cancer Res* 62: 2522–2530.
62. Dang CT, Dannenberg AJ, Subbaramaiah K, Dickler MN, Moasser MM, et al. (2004) Phase II Study of Celecoxib and Trastuzumab in Metastatic Breast Cancer Patients Who Have Progressed after Prior Trastuzumab-Based Treatments. pp 4062–4067.
63. Howe LR, Chang S-H, Tolle KC, Dillon R, Young LJ, et al. (2005) HER2/neu-Induced Mammary Tumorigenesis and Angiogenesis Are Reduced in Cyclooxygenase-2 Knockout Mice. pp 10113–10119.
64. Howe LR, Subbaramaiah K, Patel J, Masferrer JL, Deora A, et al. (2002) Celecoxib, a selective cyclooxygenase 2 inhibitor, protects against human epidermal growth factor receptor 2 (HER-2)/neu-induced breast cancer. *Cancer Res* 62: 5405–5407.
65. Kelley NS, Hubbard NE, Erickson KL (2007) Conjugated linoleic acid isomers and cancer. *J Nutr* 137: 2599–2607.
66. Wahle KW, Heys SD, Rotondo D (2004) Conjugated linoleic acids: are they beneficial or detrimental to health? *Prog Lipid Res* 43: 553–587.
67. Meng X, Shoemaker SF, McGee SO, Ip MM (2008) t10,c12-Conjugated linoleic acid stimulates mammary tumor progression in Her2/ErbB2 mice through activation of both proliferative and survival pathways. pp 1013–1021.
68. Ip MM, McGee SO, Masso-Welch PA, Ip C, Meng X, et al. (2007) The t10,c12 isomer of conjugated linoleic acid stimulates mammary tumorigenesis in transgenic mice over-expressing erbB2 in the mammary epithelium. *Carcinogenesis* 28: 1269–1276.
